# Supplementary material for: Quinol derivatives as potential trypanocidal agents
Source: PubMed Central journal article supplement (PMC3281193; doi:10.1016/j.bmc.2011.12.018), 2012-02-15
Supplement: mmc1.pdf [file mmc1.pdf]

## Supporting information for:

### Quinol Derivatives as Potential Trypanocidal Agents.

Amy Capes,<sup>¶[a]</sup> Stephen Patterson,<sup>¶[a]</sup> Susan Wyllie,<sup>[a]</sup> Irene Hallyburton,<sup>[a]</sup> Iain T. Collie,<sup>[a]</sup>  
Andrew J. McCarroll,<sup>[b]</sup> Malcolm F. G. Stevens,<sup>[b]</sup> Julie A. Frearson,<sup>[a]</sup> Paul G. Wyatt,<sup>[a]</sup> Alan H.  
Fairlamb,<sup>[a]</sup> Ian H. Gilbert\*<sup>[a]</sup>

#### Contents

|                                                 |    |
|-------------------------------------------------|----|
| Compound <b>3</b> <sup>1</sup> H-NMR spectrum   | 2  |
| Compound <b>3</b> <sup>13</sup> C-NMR spectrum  | 3  |
| Compound <b>12</b> <sup>1</sup> H-NMR spectrum  | 4  |
| Compound <b>12</b> <sup>13</sup> C-NMR spectrum | 5  |
| Compound <b>19</b> <sup>1</sup> H-NMR spectrum  | 6  |
| Compound <b>19</b> DEPTq NMR spectrum           | 7  |
| Compound <b>35</b> <sup>1</sup> H-NMR spectrum  | 8  |
| Compound <b>38</b> <sup>1</sup> H-NMR spectrum  | 9  |
| Compound <b>38</b> <sup>13</sup> C-NMR spectrum | 10 |
| Compound <b>42</b> <sup>1</sup> H-NMR spectrum  | 11 |
| Compound <b>42</b> <sup>13</sup> C-NMR spectrum | 12 |
| Compound <b>44</b> <sup>1</sup> H-NMR spectrum  | 13 |
| Compound <b>44</b> <sup>13</sup> C-NMR spectrum | 14 |
| Compound <b>46</b> <sup>1</sup> H-NMR spectrum  | 15 |
| Compound <b>46</b> <sup>13</sup> C-NMR spectrum | 16 |

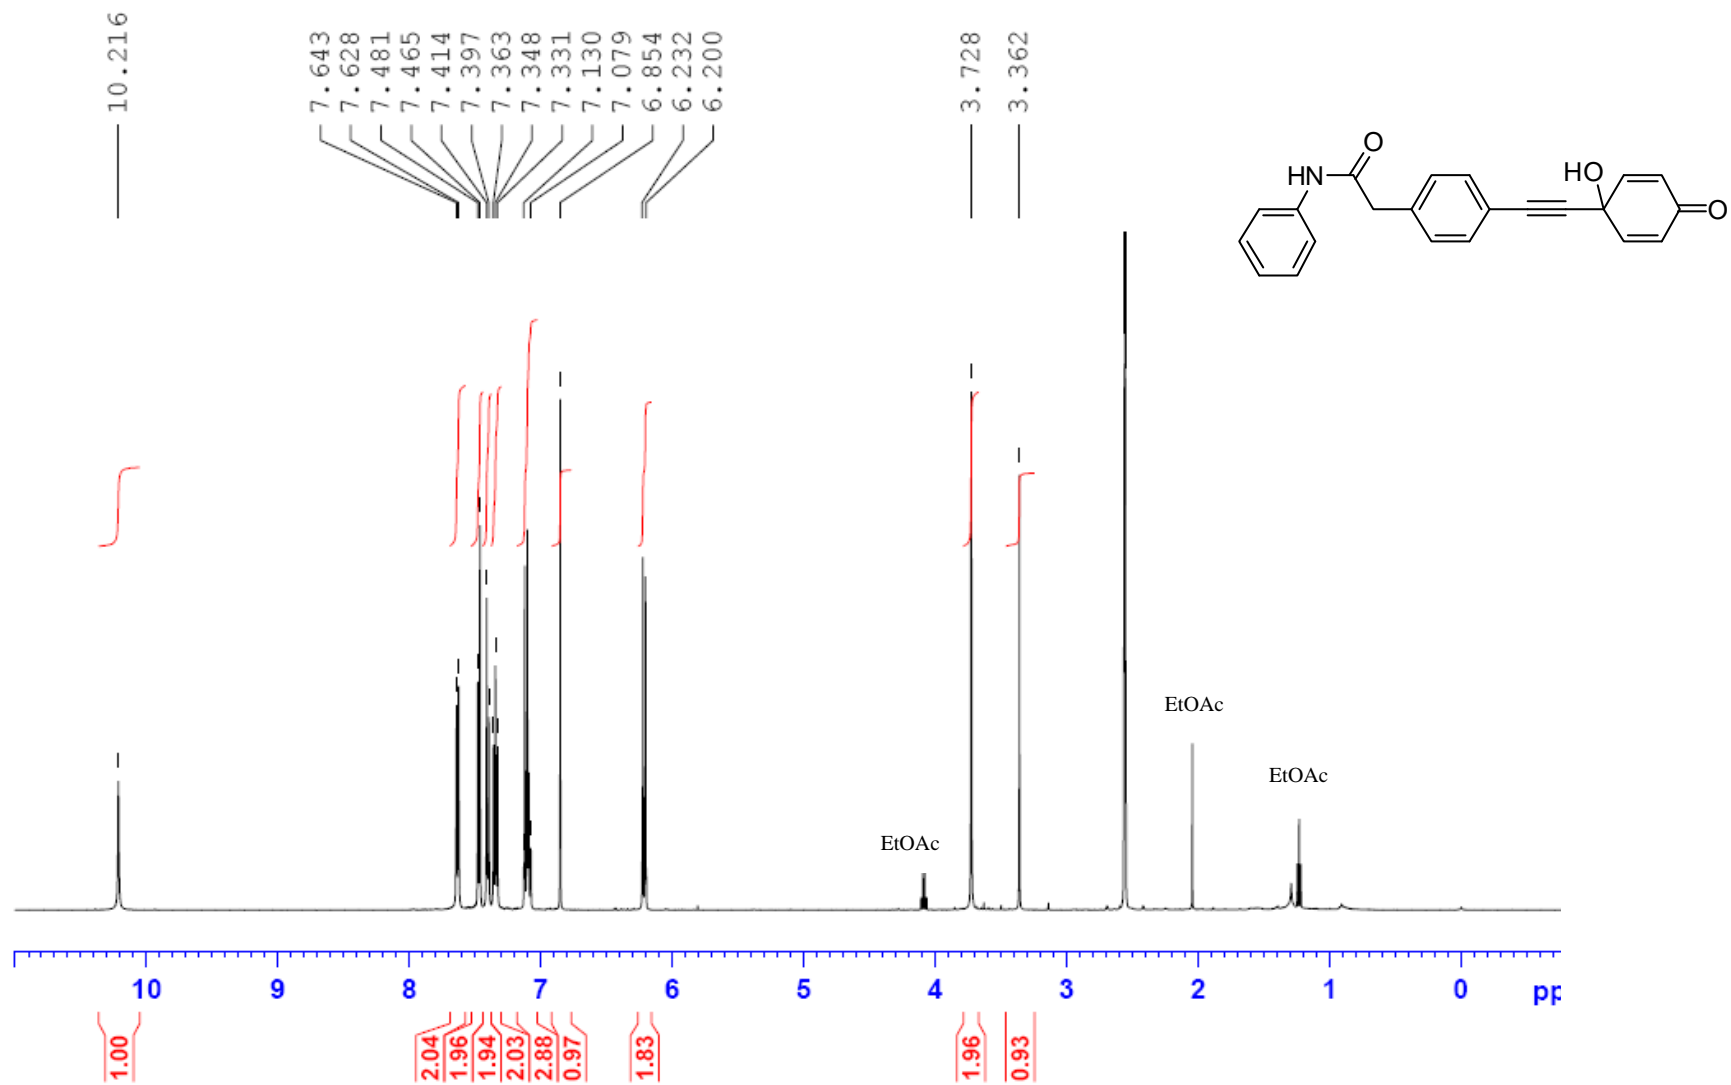

$^1\text{H}$  NMR of 2-(4-((1-hydroxy-4-oxocyclohexa-2,5-dien-1-yl)ethynyl)phenyl)-*N*-phenylacetamide (compound **3**).

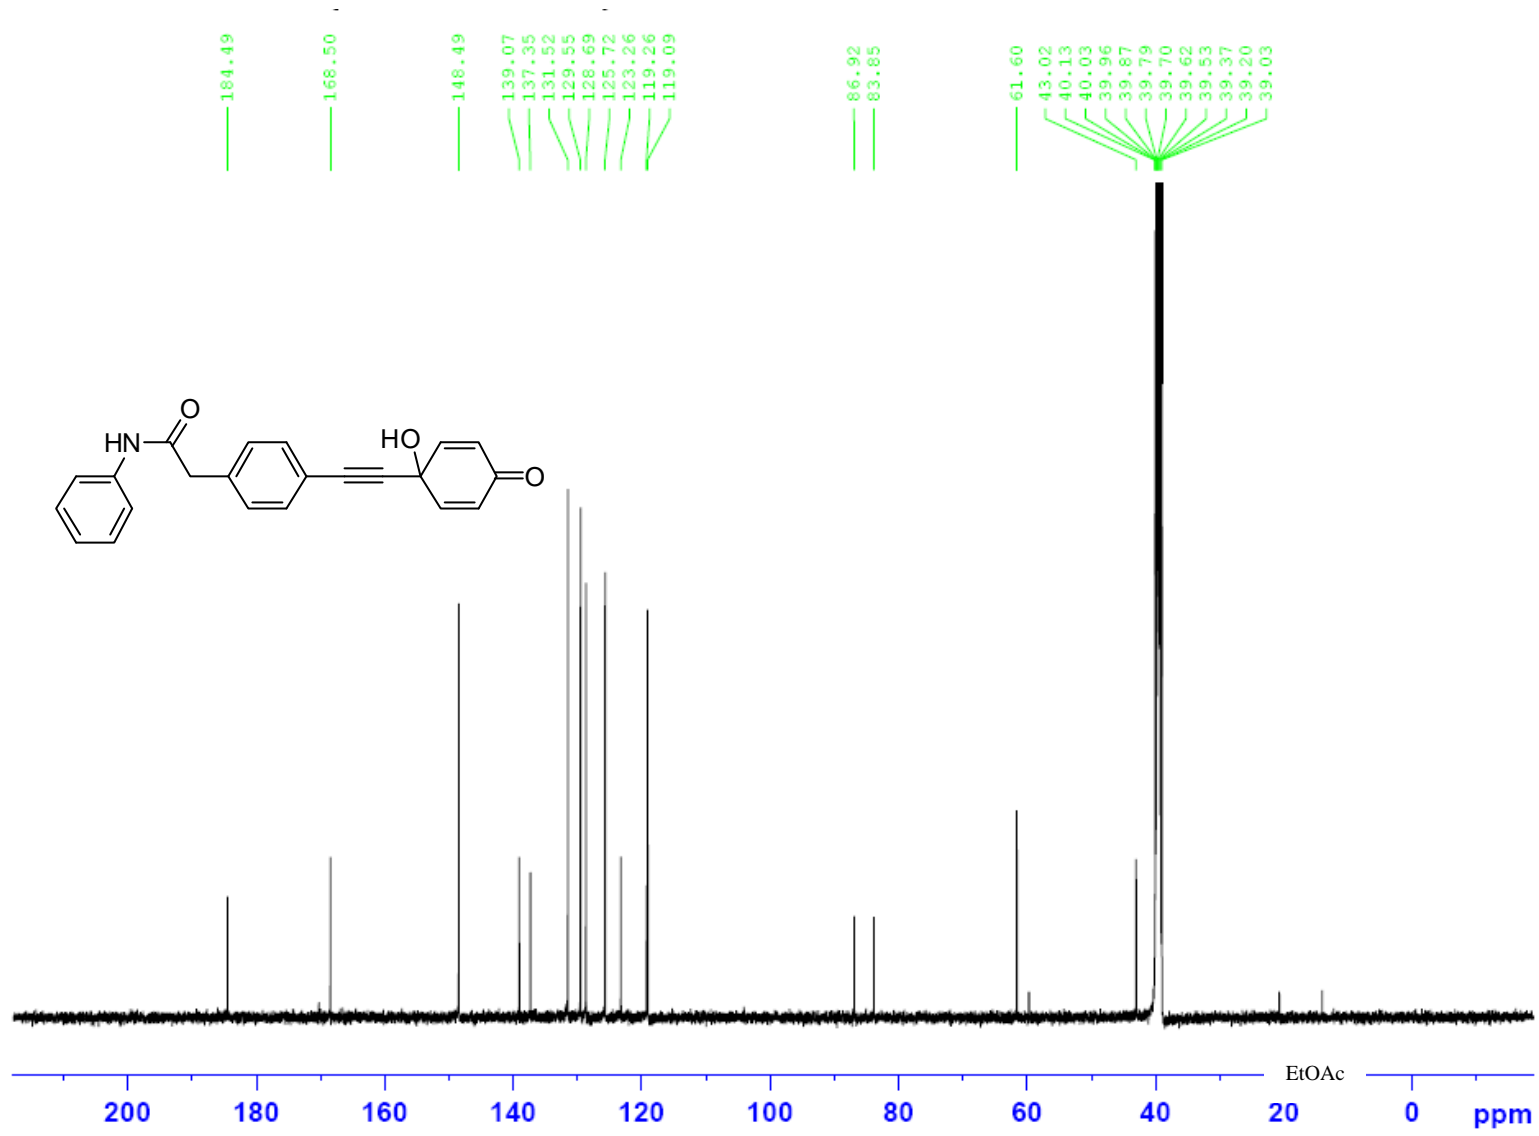

<sup>13</sup>C NMR of 2-(4-((EtOAc)oxy-4-oxocyclohexa-2,5-dien-1-yl)ethynyl)phenylacetone (compound 3).

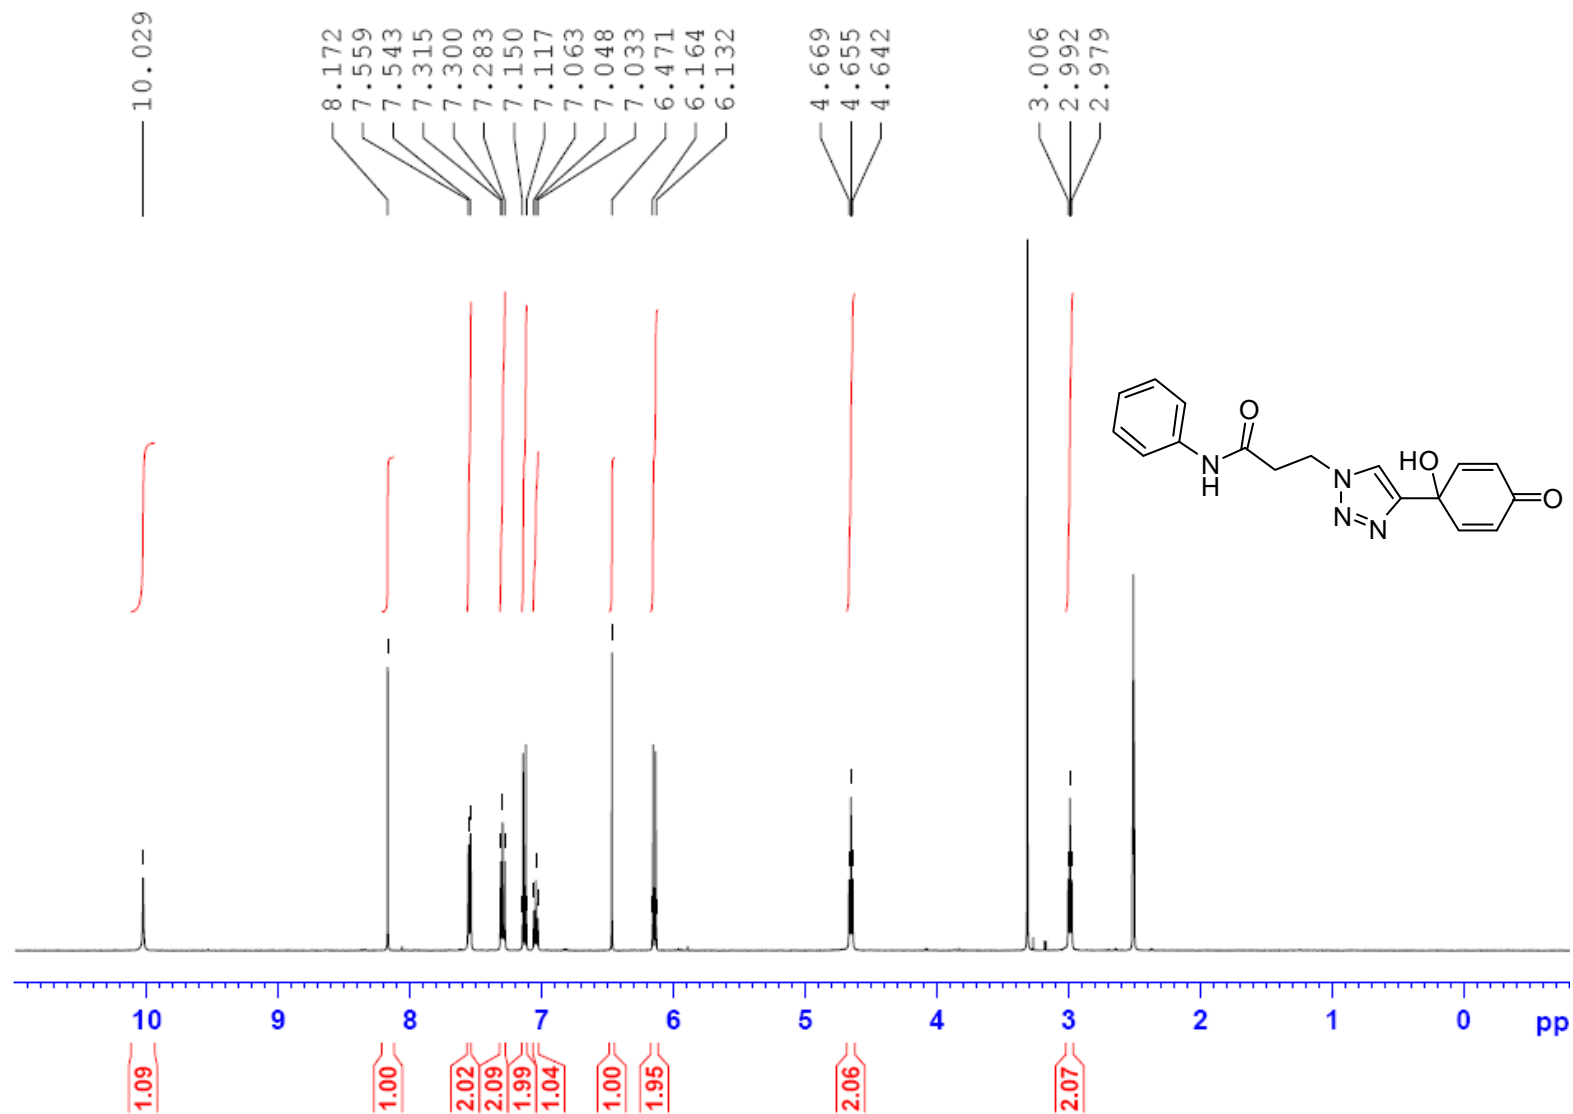

<sup>1</sup>H NMR of 3-(4-(1-hydroxy-4-oxocyclohexa-2,5-dien-1-yl)-1*H*-1,2,3-triazol-1-yl)-*N*-phenylpropanamide (compound 12).

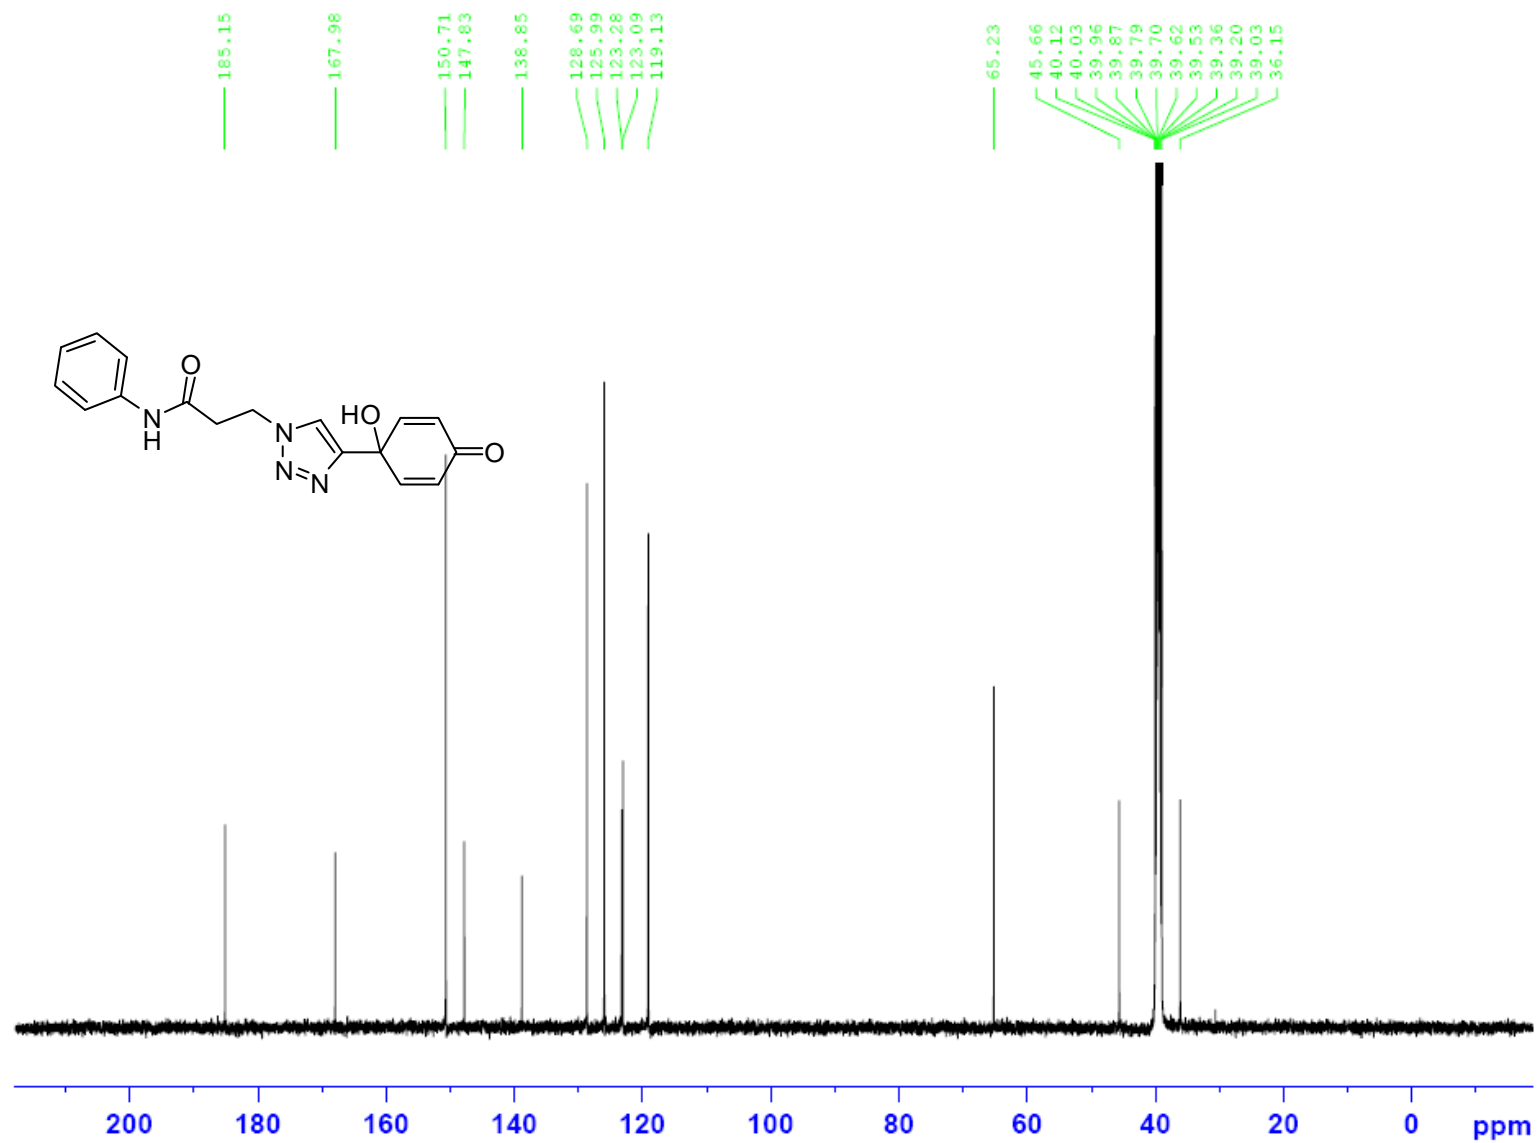

<sup>13</sup>C NMR of 3-(4-(1-hydroxy-4-oxocyclohexa-2,5-dien-1-yl)-1H-1,2,3-triazol-1-yl)-N-phenylpropanamide (compound 12).

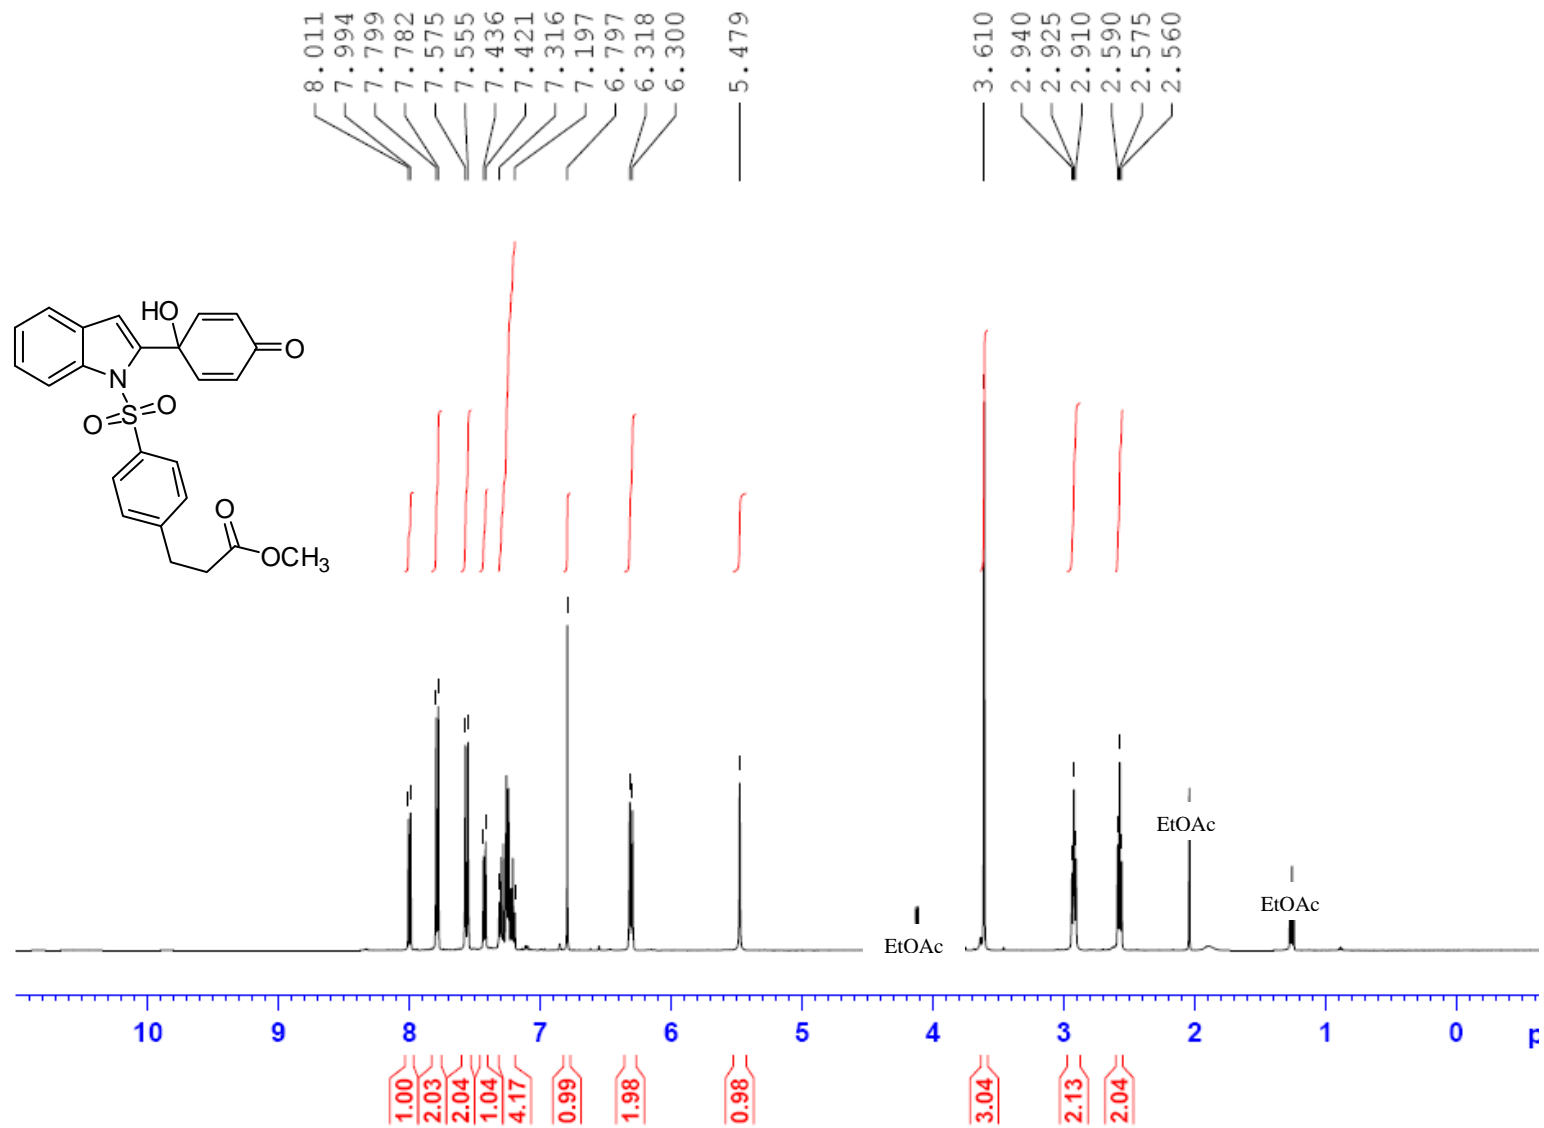

<sup>1</sup>H-NMR of methyl 3-(4-((2-(1-hydroxy-4-oxocyclohexa-2,5-dien-1-yl)-1H-indol-1-yl)sulfonyl)phenyl)propanoate (compound **19**).

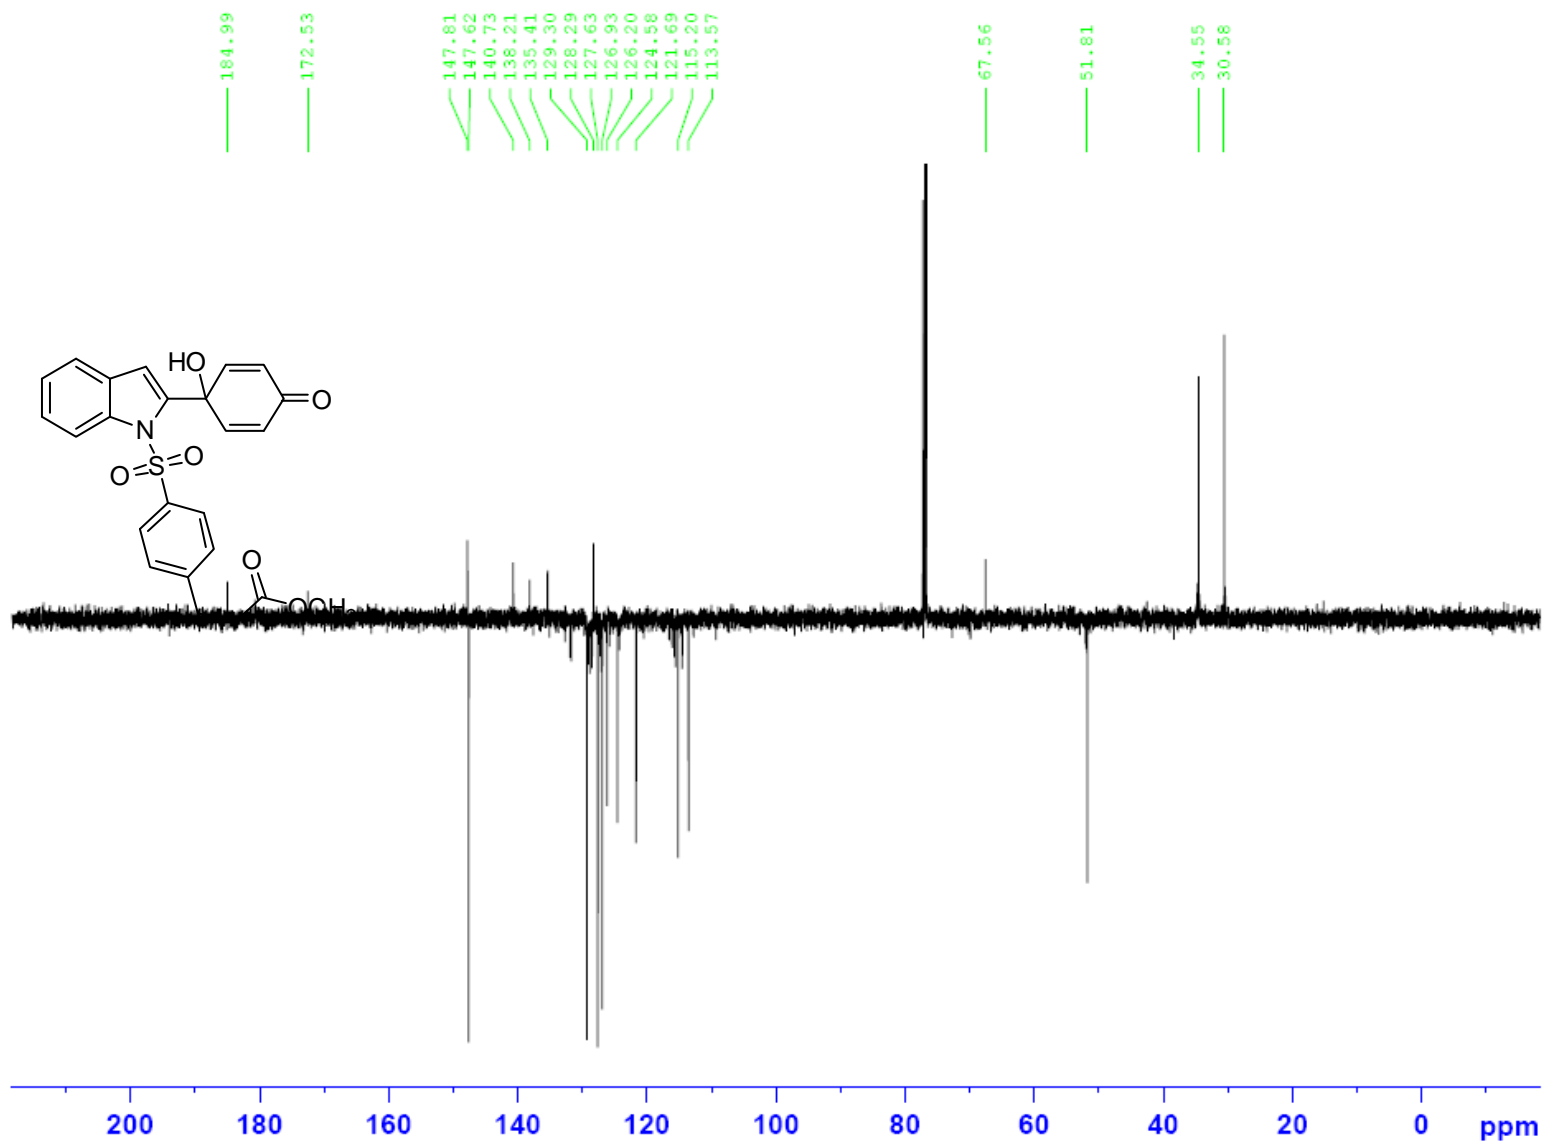

DEPTq NMR of methyl 3-(4-((2-(1-hydroxy-4-oxocyclohexa-2,5-dien-1-yl)-1*H*-indol-1-yl)sulfonyl)phenyl)propanoate (compound **19**).

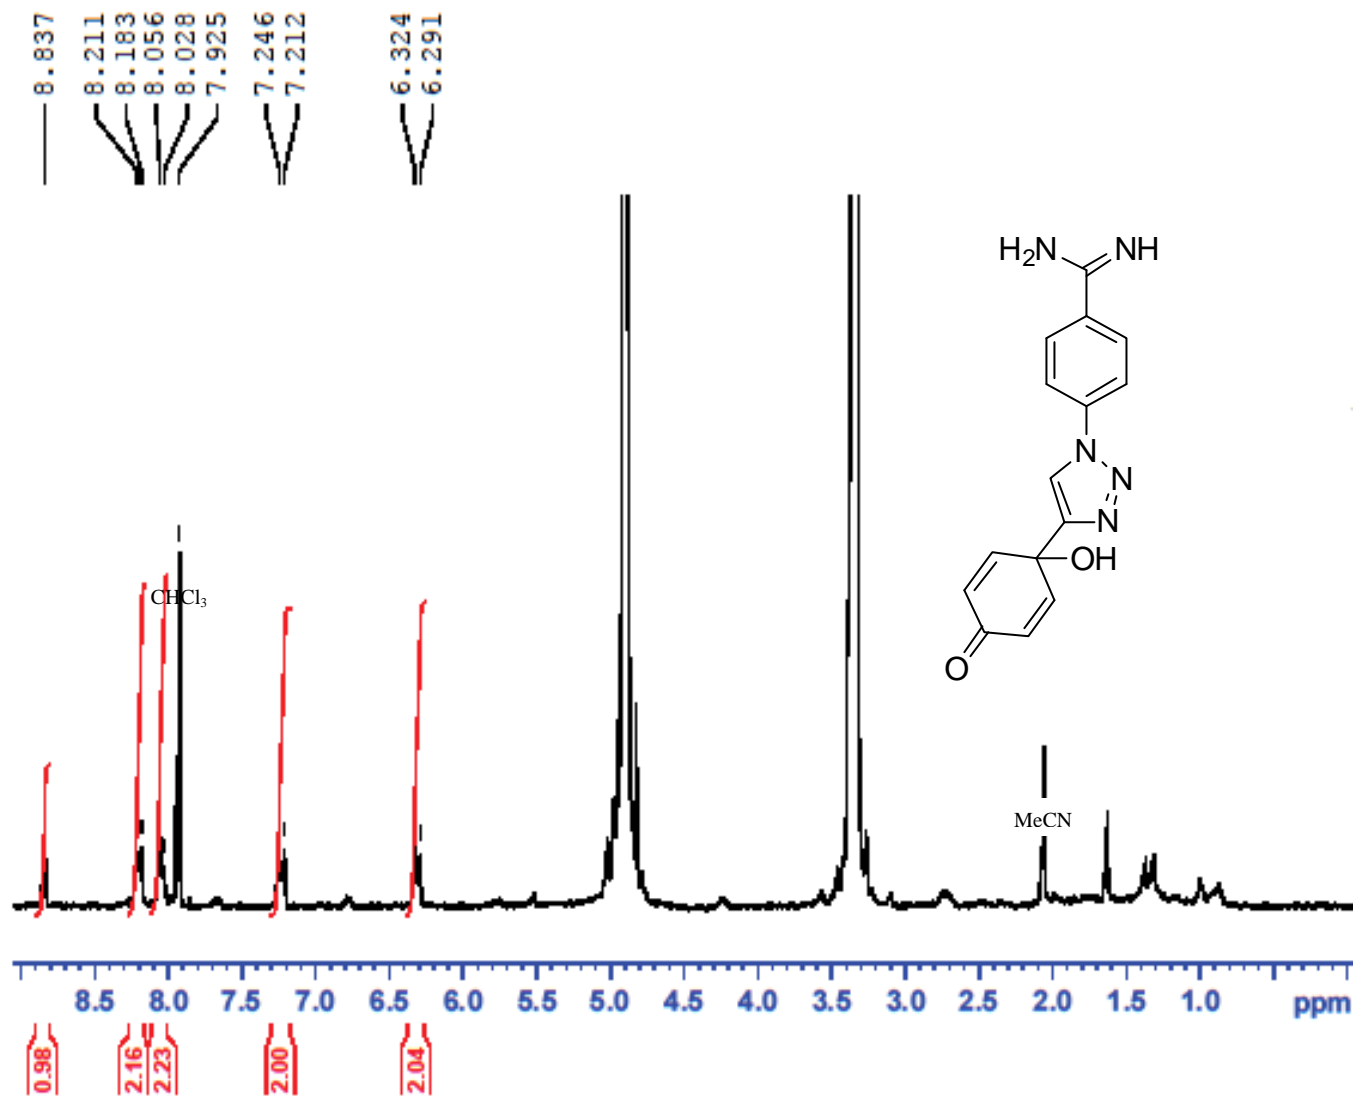

<sup>1</sup>H-NMR of 4-(4-(1-hydroxy-4-oxocyclohexa-2,5-dienyl)-1H-1,2,3-triazol-1-yl)benzimidamide (compound 35).



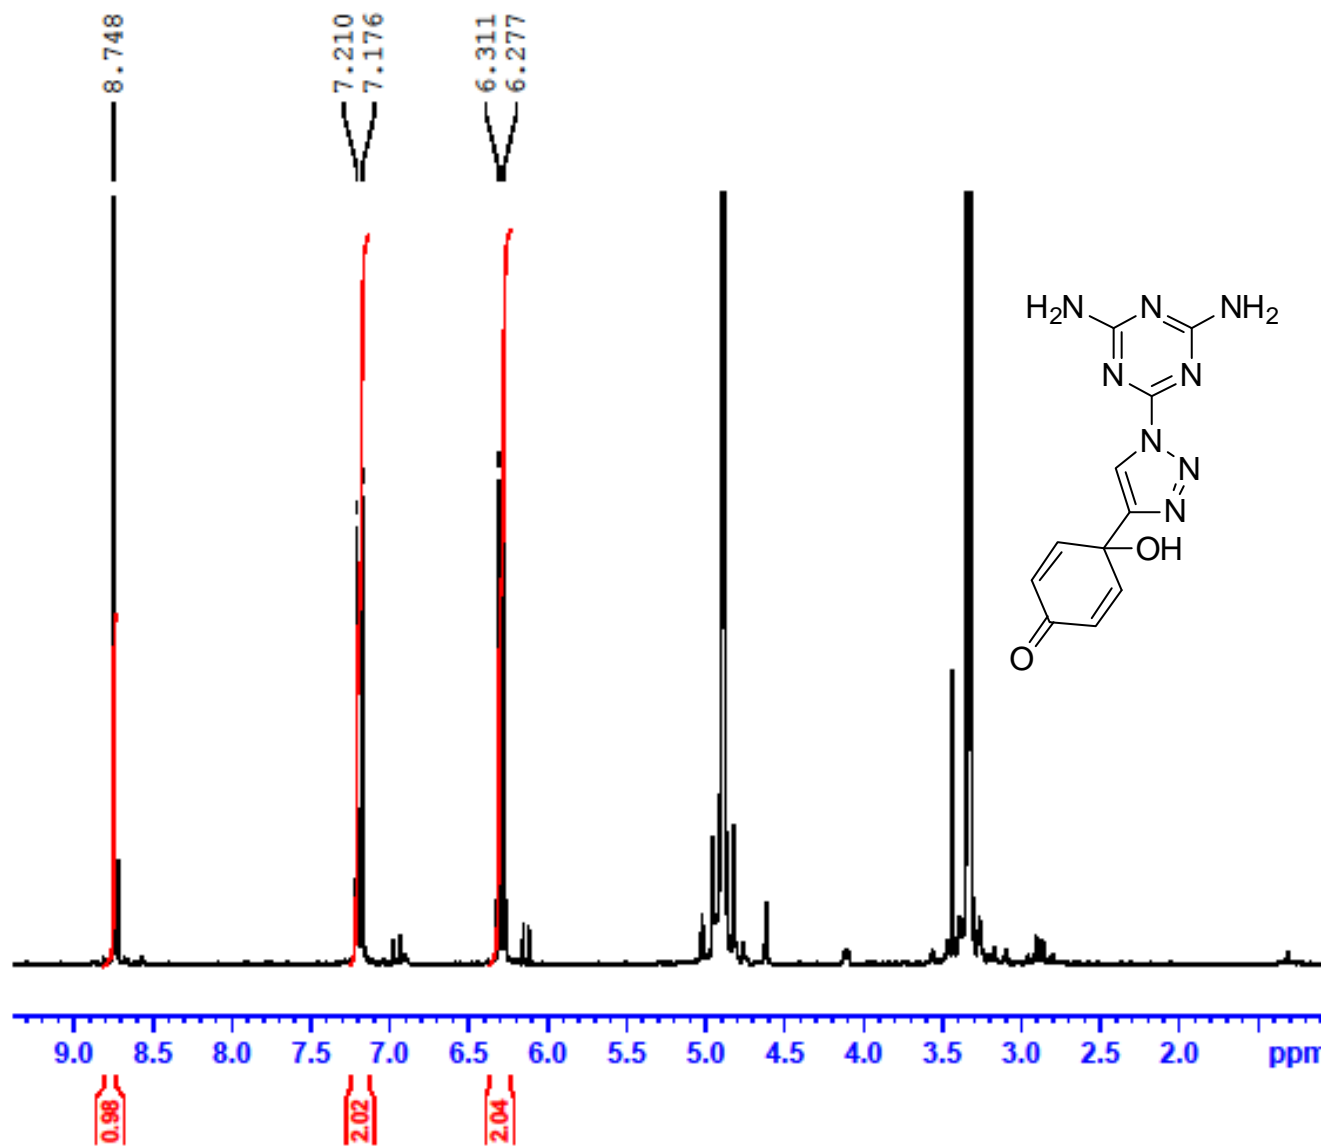

<sup>1</sup>H-NMR of 4-(1-(4,6-diamino-1,3,5-triazin-2-yl)-1H-1,2,3-triazol-4-yl)-4-hydroxycyclohexa-2,5-dienone (compound **38**).

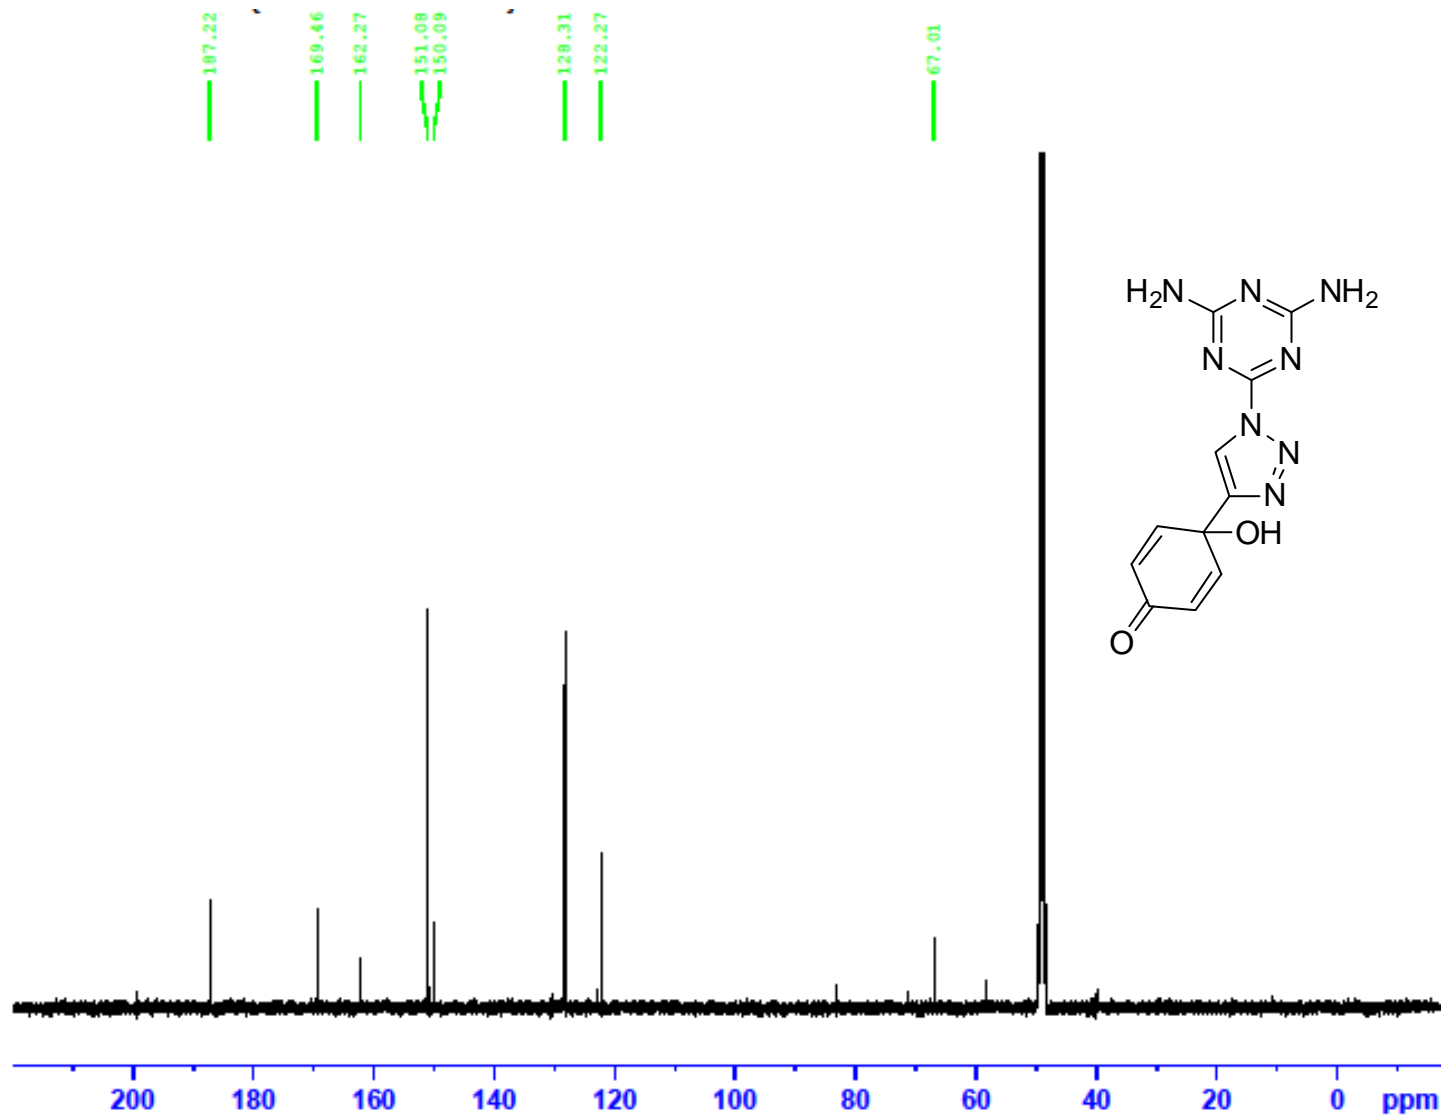

$^{13}\text{C}$ -NMR of 4-(1-(4,6-diamino-1,3,5-triazin-2-yl)-1H-1,2,3-triazol-4-yl)-4-hydroxycyclohexa-2,5-dienone (compound **38**).

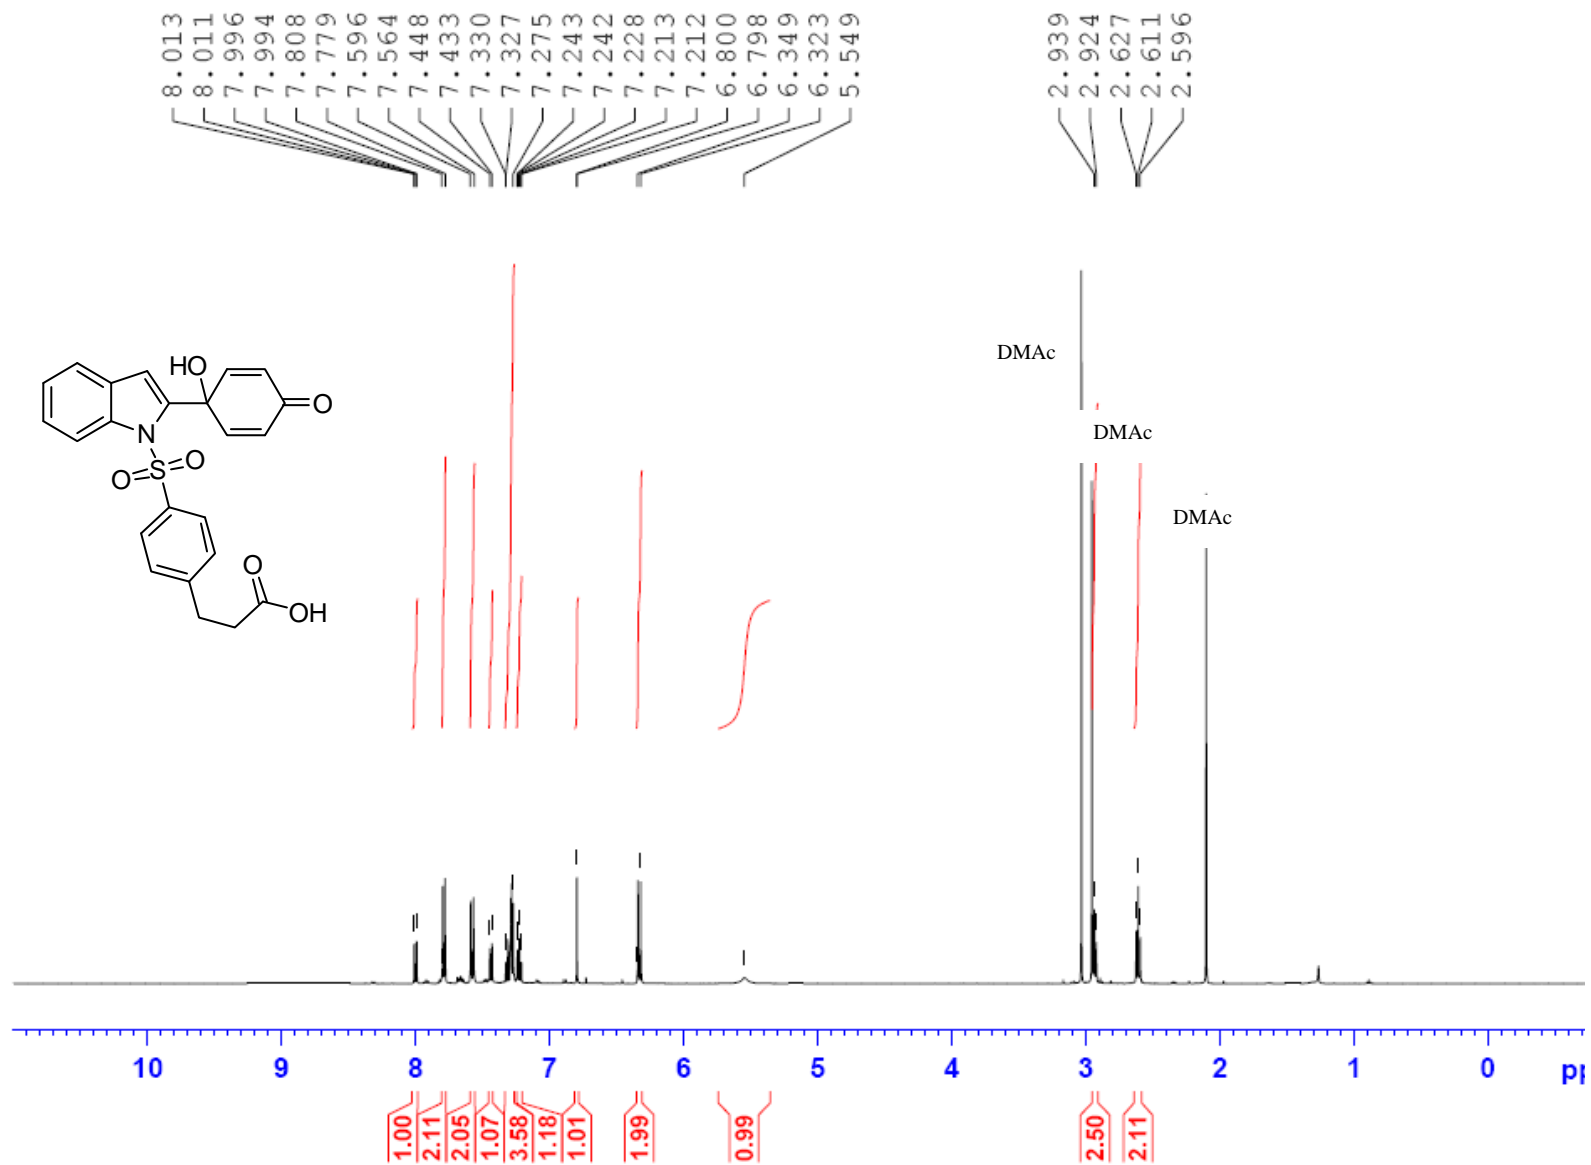

<sup>1</sup>H-NMR of 3-(4-((2-(1-Hydroxy-4-oxocyclohexa-2,5-dien-1-yl)-1H-indol-1-yl)sulfonyl)phenyl)propanoic acid (compound 42).

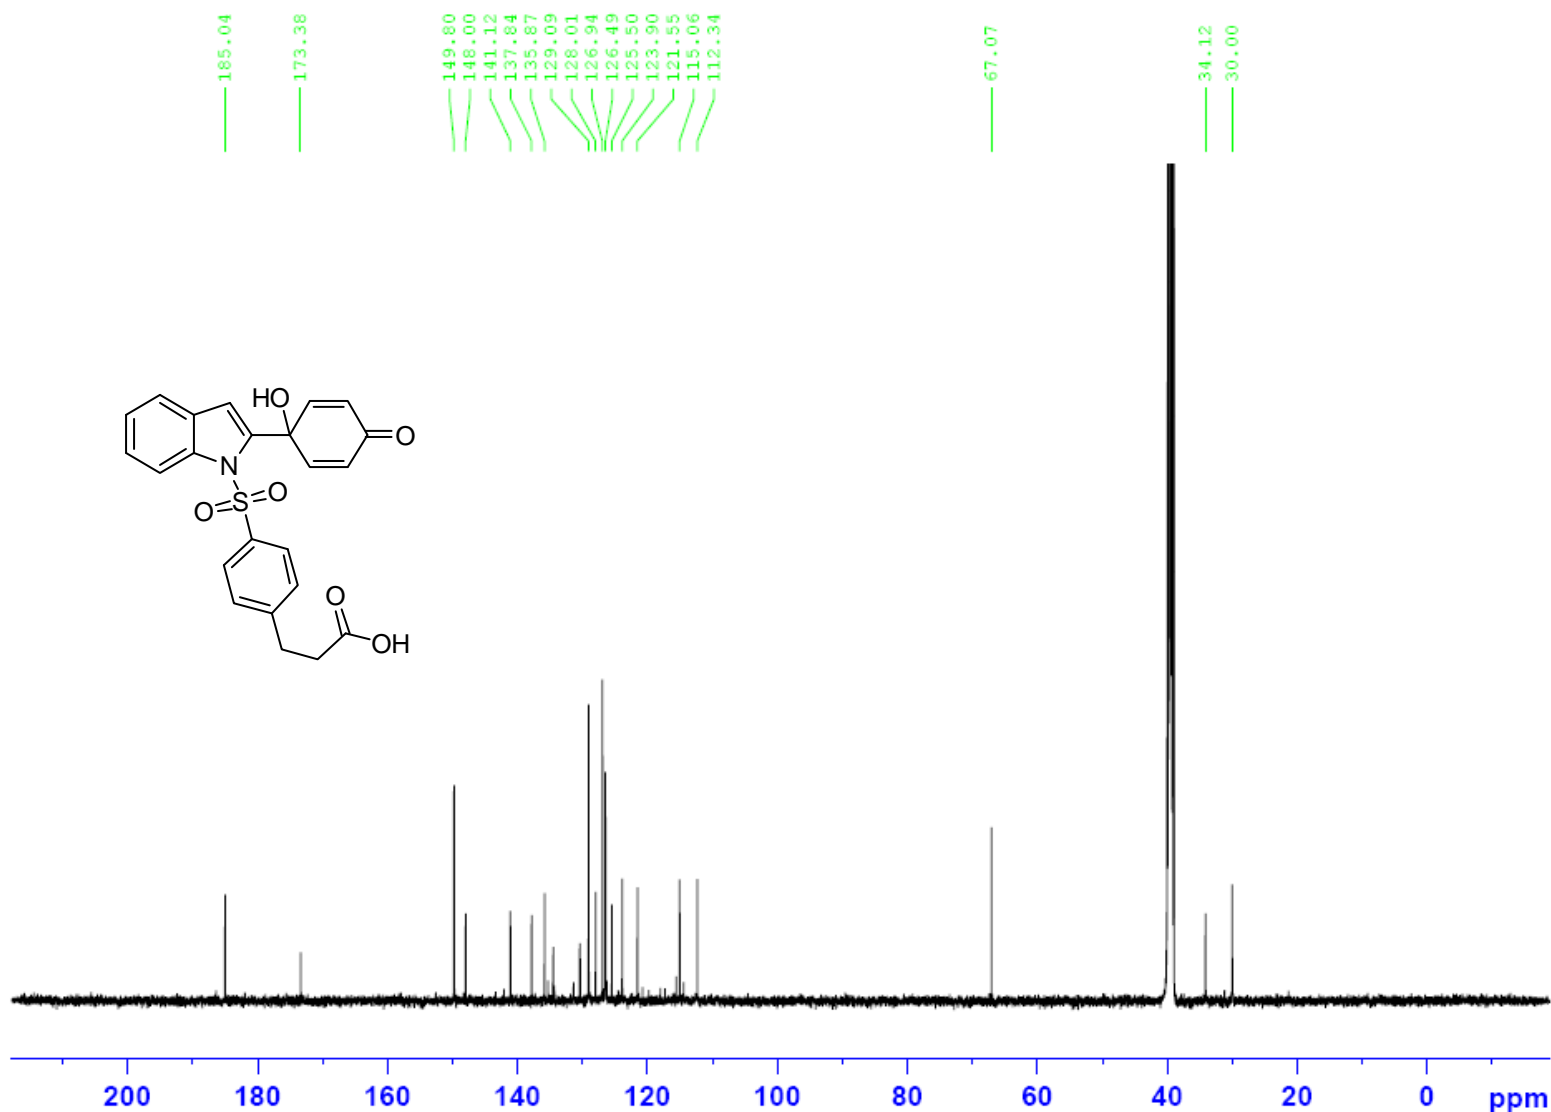

<sup>13</sup>C-NMR of 3-(4-((2-(1-Hydroxy-4-oxocyclohexa-2,5-dien-1-yl)-1H-indol-1-yl)sulfonyl)phenyl)propanoic acid (compound 42).

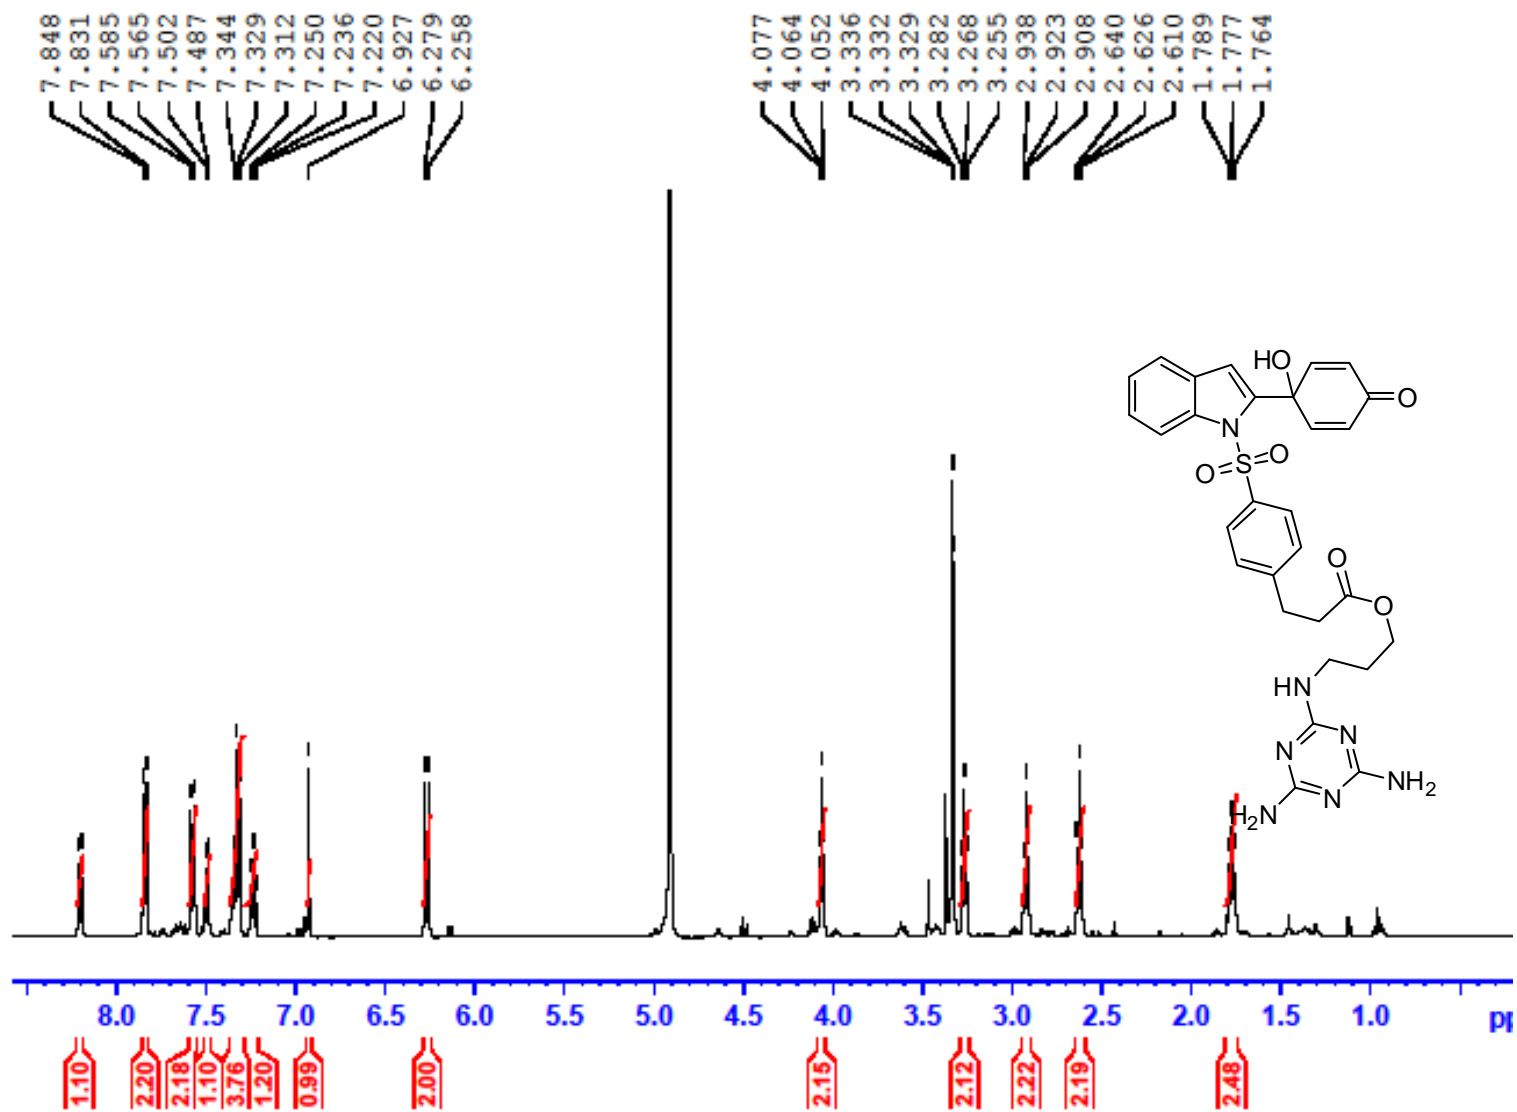

<sup>1</sup>H-NMR of 3-((4,6-diamino-1,3,5-triazin-2-yl)amino)propyl 3-(4-((2-(1-hydroxy-4-oxocyclohexa-2,5-dien-1-yl) -1*H*-indol-1-yl)sulfonyl)phenyl)propanoate (compound **44**).

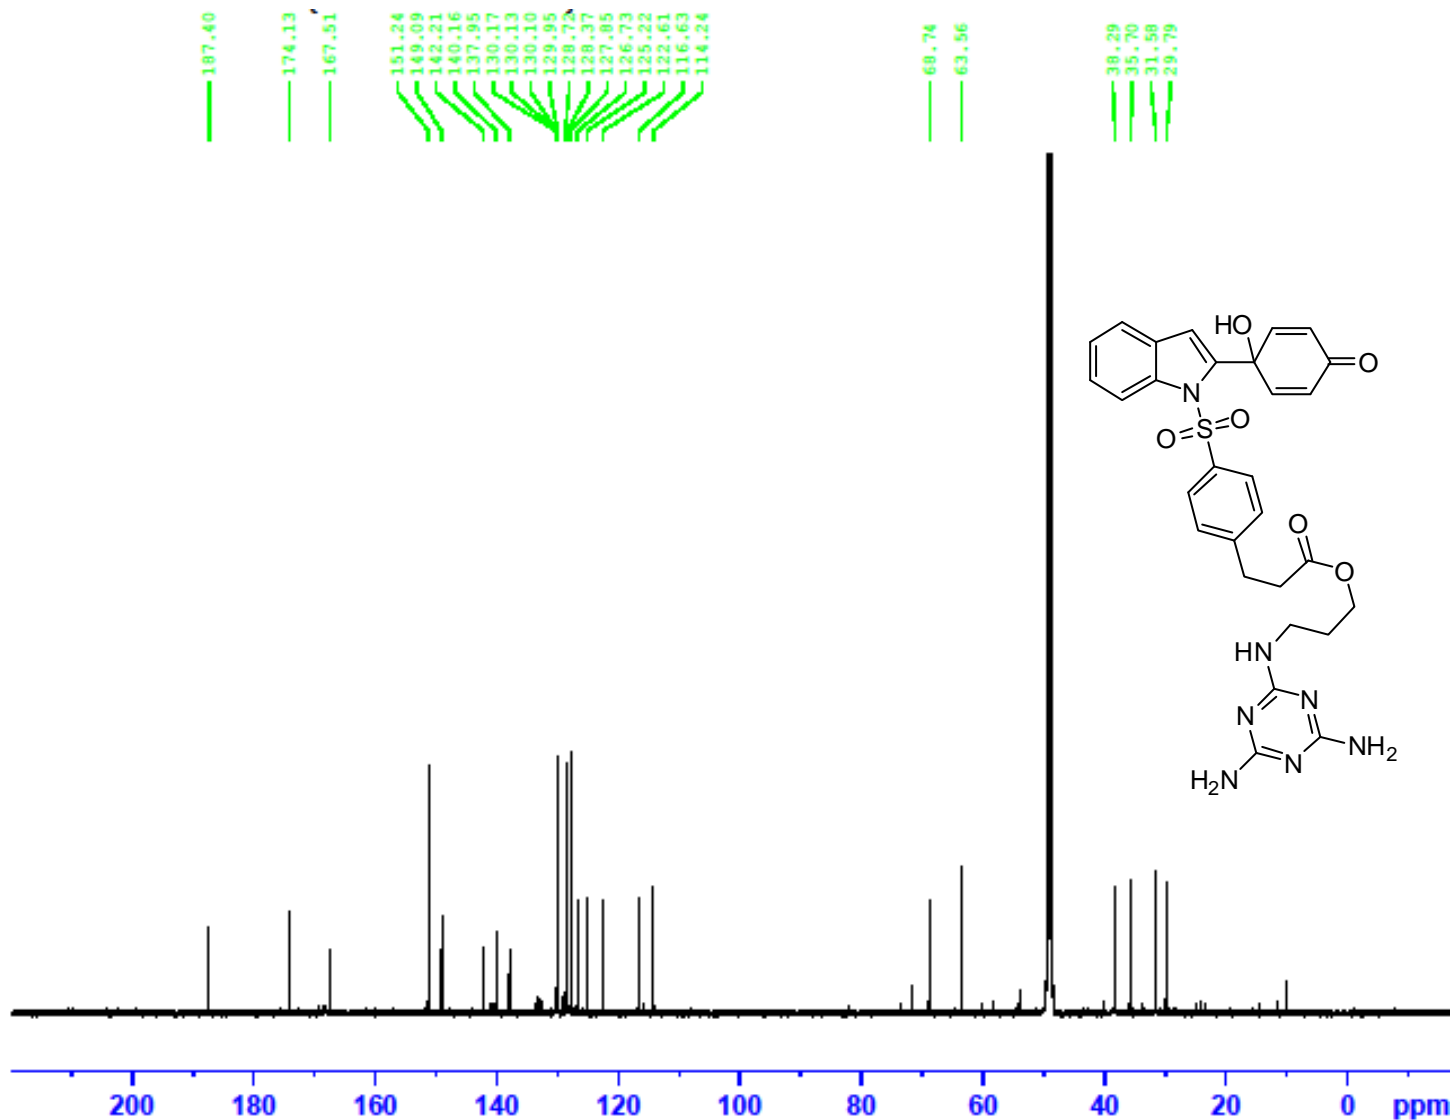

<sup>13</sup>C-NMR of 3-((4,6-Diamino-1,3,5-triazin-2-yl)amino)propyl 3-(4-((2-(1-hydroxy-4-oxocyclohexa-2,5-dien-1-yl) -1*H*-indol-1-yl)sulfonyl)phenyl)propanoate (compound **44**).

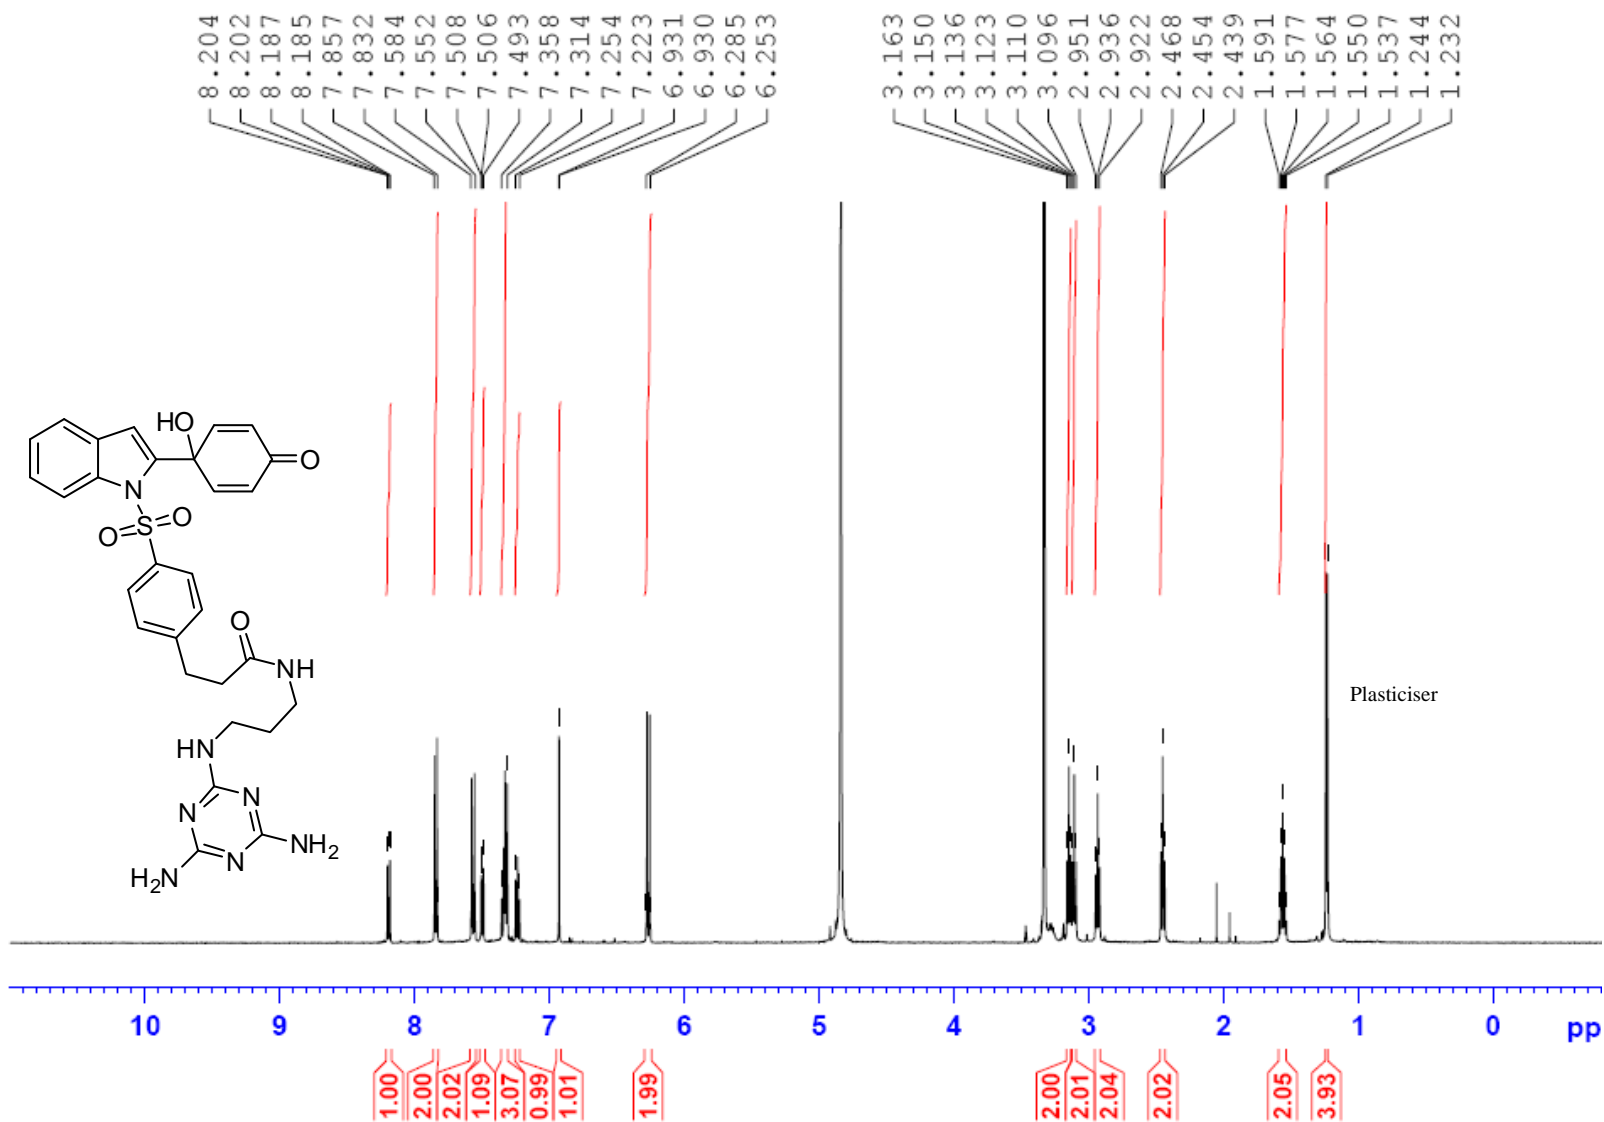

<sup>1</sup>H-NMR of *N*-(3-((4,6-Diamino-1,3,5-triazin-2-yl)amino)propyl)-3-(4-((2-(1-hydroxy-4-oxocyclohexa-2,5-dien-1-yl)-1*H*-indol-1-yl)sulfonyl)phenyl)propanamide (compound **46**).

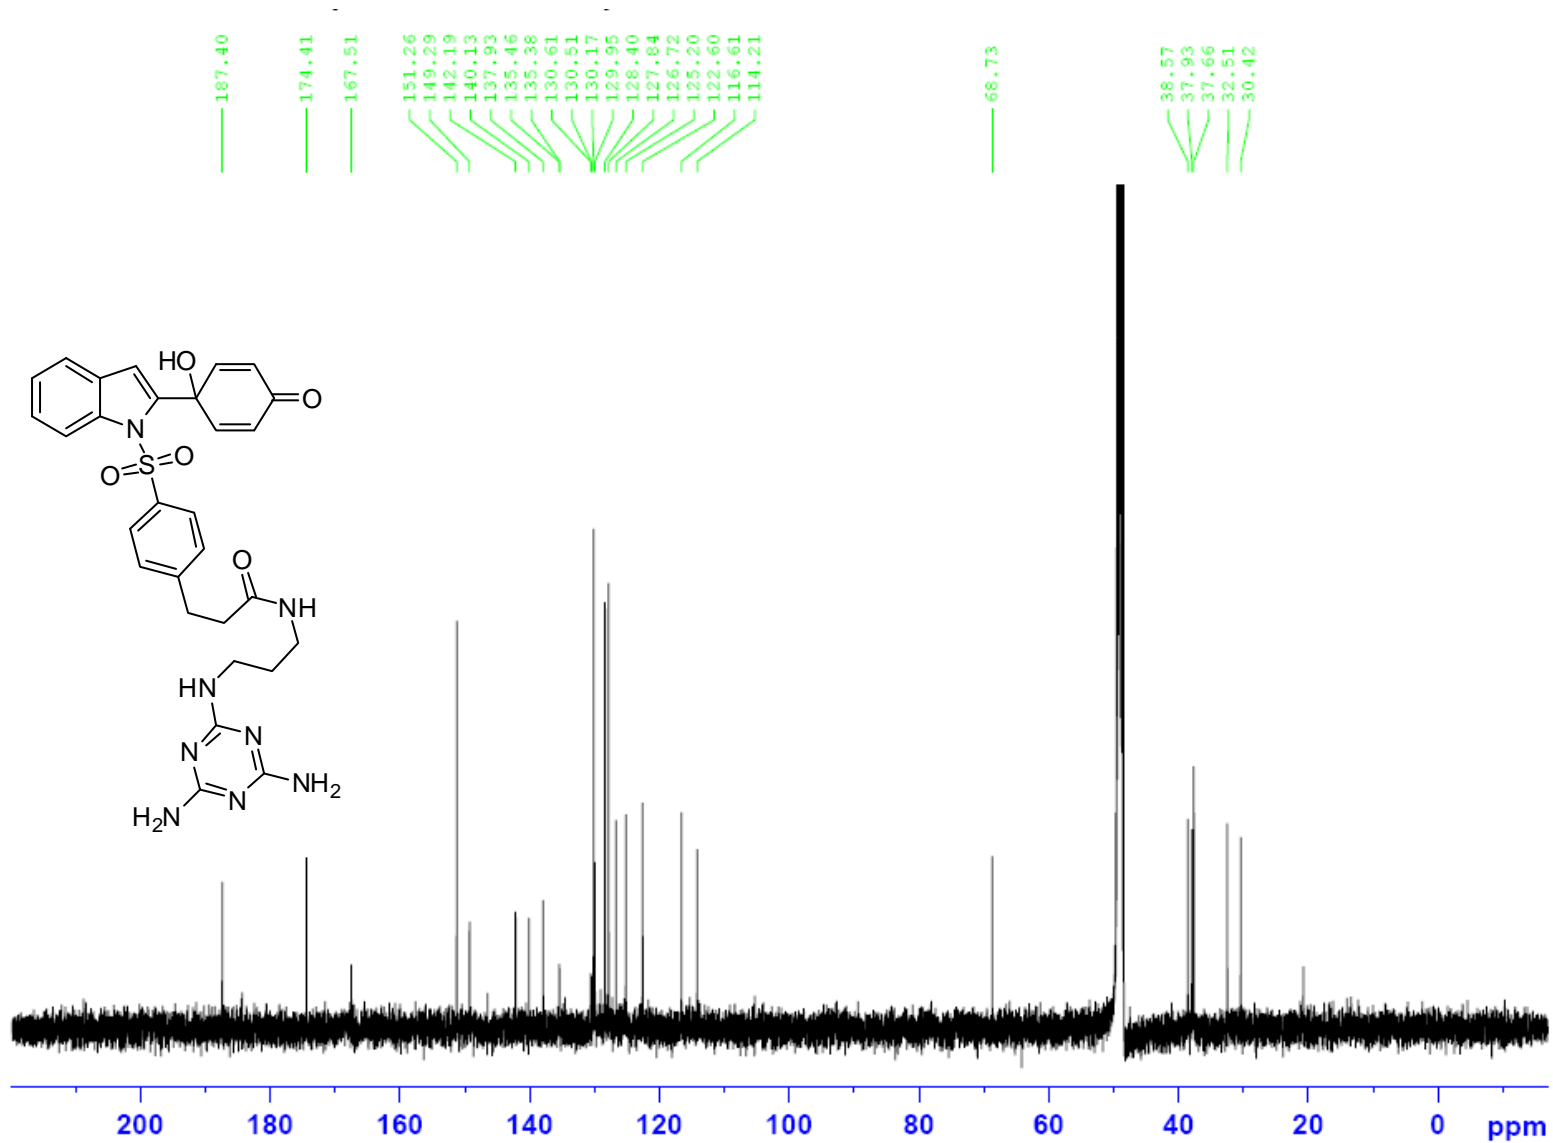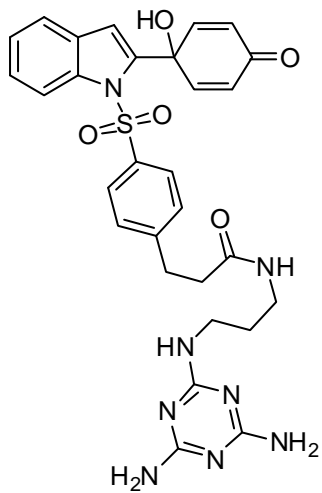

$^{13}\text{C}$ -NMR of *N*-(3-((4,6-Diamino-1,3,5-triazin-2-yl)amino)propyl)-3-(4-((2-(1-hydroxy-4-oxocyclohexa-2,5-dien-1-yl)-1*H*-indol-1-yl)sulfonyl)phenyl)propanamide (compound **46**).
